# Supplementary material
Source: Research Square preprint supplement (doi:10.21203/rs.3.rs-7971131/v1)
Supplement: Supplementary file 1 [file 76e3f8d5bf47062290ed73c7.docx]

This questionnaire was developed to gather input from stakeholders, general dentists, and dental specialists for the research study "Defining the Acceptable Oral and Dental Health and Its Criteria: A Step Towards Universal Health Coverage." The original version of the questionnaire has been translated and is available in its original language at the link below:

<https://forms.gle/fnvmJaoHgnCD31Lz9>

Dear Participant,

Greetings and best wishes. The questionnaire you have received is part of a study titled "Defining The Acceptable Oral and Dental Health and Its Criteria: A Step Towards Universal Health Coverage." The basic health service package is defined as the minimum set of essential health and medical services that everyone needs to access with guaranteed availability.

Essential services refer to those health and medical services that provide the greatest improvement in national health status for the costs incurred. Alternatively, essential services are those that, if not provided, would have the most significant negative impact on the community's health status.

Please read each question carefully and indicate your response by selecting the relevant option. Kindly respond based on what you consider essential, disregarding any potential economic limitations. Your personal information and responses will only be used for the purpose of this study and will remain confidential. Participation in this study is voluntary and does not require the disclosure of your name. Completing this questionnaire will be considered as your informed consent to participate in the study.

We greatly appreciate your cooperation and thank you for dedicating your valuable time to this study.

Research Centre for Caries Prevention,

Dentistry Research Institute,

Tehran University of Medical Sciences

Research Team: Dr. Mohammad Reza Khami, Dr. Hossein Hesari, Dr. Mohammad Javad Khrazi-Fard, Dr. Mahsa Eshrati, Dr. Mahsa Karimi, Dr Kosar Ataei

**Background Information**

If you wish, please enter your full name:

Gender

- Female
- Male

Year of Birth:

Clinical Work Experience (Years):

Executive-Managerial Work Experience (Years):

Educational Qualification:

- General Dentist
- Oral Disease and Diagnosis
- Oral And Maxillofacial Radiology
- Pediatric Dentistry
- Orthodontics
- Oral And Maxillofacial Pathology
- Dental Prosthodontics
- Oral and Maxillofacial Surgery
- Periodontology
- Restorative and Aesthetic Dentistry
- Endodontics
- Dental public health

For the following conditions, please select how frequently must a patient experience each condition to be covered by insurance as basic health service package:

**Difficulty eating or the need to alter food or drink due to dental, gum, or denture issues**

- Rarely
- Occasionally
- Often
- Always

**Difficulty swallowing food due to oral and pharyngeal issues**

- Rarely
- Occasionally
- Often
- Always

**Difficulty speaking or expressing oneself clearly due to dental, gum, or denture issues**

- Rarely
- Occasionally
- Often
- Always

**Difficulty sleeping due to maxillofacial disorders or dental, gum, or denture issues**

- Rarely
- Occasionally
- Often
- Always

**Difficulty in performing usual duties or tasks due to dental, gum, or denture issues**

- Rarely
- Occasionally
- Often
- Always

**Feelings of embarrassment or lack of self-acceptance due to dental, gum, or denture issues**

- Rarely
- Occasionally
- Often
- Always

**Difficulty participating in social activities or community participation due to dental, gum, or denture issues**

- Rarely
- Occasionally
- Often
- Always

**Embarrassment while smiling, laughing, or showing teeth due to dental, gum, or denture issues**

- Rarely
- Occasionally
- Often
- Always

**Dissatisfaction with the appearance of teeth, gums, and dentures**

- Rarely
- Occasionally
- Often
- Always

**Experiencing pain in the oral area**

- Rarely
- Occasionally
- Often
- Always

**Experiencing dry mouth**

- Rarely
- Occasionally
- Often
- Always

**Experiencing tooth sensitivity to cold, hot, sour, or sweet foods or drinks**

- Rarely
- Occasionally
- Often
- Always

Please feel free to add any other comments in this section:

For the following conditions, please indicate the stage at which insurance coverage should begin under the basic health service package:

**Tooth caries in one or more teeth**

- Initial caries (clinical lesion with mild demineralization, limited to enamel or shallow depth of cementum and dentin)
- Moderate caries (visible signs of enamel breakdown or relatively demineralized dentin)
- Advanced caries (completely cavitated enamel with exposed dentin, deep or severe demineralization of dentin)

**Periodontal disease in one area or throughout the mouth (CAL: Clinical Attachment Loss)**

- Gingivitis
- Periodontitis Stage 1 (1-2 mm CAL, no tooth loss)
- Stage 2 (3-4 mm CAL, no tooth loss)
- Stage 3 (more than 5 mm CAL, loss of 4 or fewer teeth)
- Stage 4 (more than 5 mm CAL, loss of 5 or more teeth)

**Oral or dental injury following an accident or trauma in teeth**

- Simple crown fracture with enamel damage
- Crown fracture with dentin damage, no pulp involvement
- Crown fracture with significant dentin damage and pulp involvement
- Non-vital tooth with or without crown damage
- Complete tooth avulsion
- Crown fracture with or without loss of tooth structure
- Tooth mobility without crown or root fracture
- Crown fracture from the cervical area

Please feel free to add any other comments in this section:

For the following conditions, please indicate whether the condition should be covered by insurance as basic health service package

**Loss of one or more teeth**

- Yes
- No

**Suffering from noma or receiving related treatments**

- Yes
- No

**Suffering from any type of oral cancer or receiving related treatments**

- Yes
- No

**Suffering from any type of craniofacial skeletal-muscular disorders (e.g., cleft palate, cleft lip, etc.) from birth or receiving related treatments**

- Yes
- No

**Loss of tooth crown(s) with the roots remaining in the jaw**

- Yes
- No

**Occurrence of swelling, abscess, halitosis, or other symptoms related to infections in the mouth and teeth**

- Yes
- No

**Presence of ulcerative lesions in the mouth**

- Yes
- No

**Presence of non-ulcerative lesions in the mouth**

- Yes
- No

**Feeling pain in the TMJ or facial muscles**

- Yes
- No

Please feel free to add any other comments in this section:

We sincerely appreciate your cooperation.
